# Supplementary material for: A convenient method to access long-chain and functionalised mixed methylphosphonate esters and their application in the synthesis of ionic liquids
Source: Royal Society of Chemistry journal article supplement (doi:10.1039/c1cc14490a), 2011-01-01
Supplement: c1cc14490a.pdf [file c1cc14490a.pdf]

# Convenient method to access long-chain and functionalized mixed methylphosphonate esters and their application in the synthesis of ionic liquids

Swetlana J. Sachnov,<sup>a</sup> Peter S. Schulz<sup>a</sup> and Peter Wasserscheid<sup>\*a</sup>

## Experimental

The ionic liquid [EMIM] methyl methylphosphonate was received from BASF AG. All reagents were purchased from Aldrich, Fluka, Merck KGaA with synthesis grades.

## Synthesis of asymmetric methyl methylphosphonate esters

### Synthesis of AcNMe(Me)PO<sub>3</sub>

1.2 eq of the ionic liquid [EMIM] methyl methylphosphonate was weighted into a dry Schlenk flask and 1.0 eq of bromoacetonitrile was added dropwise under stirring. The reaction mixture was stirred for 5 h at room temperature under an Ar atmosphere. The reaction mixture was subsequently extracted four times with diethylether. The combined diethylether phases were concentrated to a small volume and dried under reduced pressure to yield the product ester (42 %).

### Synthesis of MeAcMe(Me)PO<sub>3</sub>

1.2 eq of the ionic liquid [EMIM] methyl methylphosphonate was weighted into a dry Schlenk flask and 1.0 eq of methyl 2-chloroacetate was added dropwise under stirring. The reaction mixture was stirred for 12 h at room temperature under an Ar atmosphere. The reaction mixture was subsequently extracted four times with diethylether. The combined diethylether phases were concentrated to a small volume and dried under reduced pressure to yield the product ester (74 %).

### Synthesis of BuMe(Me)PO<sub>3</sub>

1.0 eq of 1-bromobutane was weighted into a dry Schlenk flask and 1.2 eq of the ionic liquid [EMIM] methyl methylphosphonate was added. The reaction mixture was stirred for 20 h at 50 °C under an Ar atmosphere. The reaction mixture was subsequently extracted four times with diethylether. The combined diethylether phases were concentrated to a small volume and dried under reduced pressure to yield the product ester (85 %).

### Synthesis of OcMe(Me)PO<sub>3</sub>

1.0 eq of 1-bromooctane was weighted into a dry Schlenk flask and 1.2 eq of the ionic liquid [EMIM] methyl methylphosphonate was added. The reaction mixture was stirred for 20 h at 60 °C under an Ar atmosphere. The reaction mixture was subsequently extracted four times with diethylether. The combined diethylether phases were concentrated to a small volume and dried under reduced pressure to yield the product ester (89 %).

### Synthesis of (MeEG<sub>3</sub>)Me(Me)PO<sub>3</sub>

1.0 eq of PEG-benzenesulfonate (obtained according to [S1]) was weighted into a dry Schlenk flask and 1.2 eq of the ionic liquid [EMIM] methyl methylphosphonate was added. The reaction mixture was stirred for 12 h at RT under an Ar atmosphere. The reaction mixture was subsequently extracted four times with diethylether. The combined diethylether phases were concentrated to a small volume and dried under reduced pressure to yield the product ester (87 %).

### Synthesis of DodMe(Me)PO<sub>3</sub>

1.0 eq of 1-iodododecane was weighted into a dry Schlenk flask and 1.2 eq of the ionic liquid [EMIM] methyl methylphosphonate was added. The reaction mixture was stirred for 36 h at 75 °C under an Ar atmosphere. The reaction mixture was subsequently extracted four times with diethylether. The combined diethylether phases were concentrated to a small volume and dried under reduced pressure to yield the product ester (92 %).

### General synthetic procedure for the synthesis of alkylphosphonate ionic liquids from dialkyl alkylphosphonate esters

1.0 eq of the respective alkylphosphonate ester was weighted into a dry Schlenk flask and 1.0 eq of the corresponding amine was added. Then the reaction mixture was stirred. The required conditions are summarized in Table 3.

**Table S1: Phosphonate ionic liquids: Synthesis conditions and water content.**

| Entry | Phosphonate ester                                     | Amine | Ionic Liquid                                                            | T / °C | t / d | Yield / % | Water content / ppm |
|-------|-------------------------------------------------------|-------|-------------------------------------------------------------------------|--------|-------|-----------|---------------------|
| 1     | AcNMe(Me)PO <sub>3</sub>                              | EtIm  | [EMIM]<br>[AcN(Me)PO <sub>3</sub> ] <sup>a)</sup>                       | 90     | 1     | 82        | 4494                |
| 2     | MeAcMe(Me)PO <sub>3</sub>                             | EtIm  | [EMIM]<br>[MeAc(Me)PO <sub>3</sub> ]                                    | 75     | 1     | 86        | 3304                |
| 3     | Me <sub>2</sub> (Me)PO <sub>3</sub>                   | EtIm  | [EMIM]<br>[Me(Me)PO <sub>3</sub> ]                                      | 100    | 1     | > 99      | 2744                |
| 4     | Bu <sub>2</sub> (Me)PO <sub>3</sub>                   | MIm   | [BMIM]<br>[Bu(Me)PO <sub>3</sub> ]                                      | 130    | 2     | 94        | 2345                |
| 5     | Oc <sub>2</sub> (Me)PO <sub>3</sub>                   | MIm   | [OMIM]<br>[Oc(Me)PO <sub>3</sub> ]                                      | 150    | 3     | 92        | 2771                |
| 6     | Oc <sub>2</sub> (Ph)PO <sub>3</sub>                   | MIm   | [OMIM]<br>[Oc(Ph)PO <sub>3</sub> ]                                      | 150    | 3     | >99       | 1972                |
| 7     | (MeEG <sub>3</sub> ) <sub>2</sub> (Me)PO <sub>3</sub> | MIm   | [(MeEG <sub>3</sub> )MIM]<br>[(MeEG <sub>3</sub> )(Me)PO <sub>3</sub> ] | 140    | 3     | 92        | 645                 |
| 8     | Dod <sub>2</sub> (Me)PO <sub>3</sub>                  | MIm   | [DodMIM]<br>[Dod(Me)PO <sub>3</sub> ]                                   | 160    | 3     | 98        | n.a.                |

a) Synthesis in acetonitrile

### NMR spectroscopy and ESI-MS analysis

NMR spectra were recorded on a JEOL ECX +400 spectrometer (<sup>1</sup>H: 400 MHz, <sup>13</sup>C: 100 MHz, <sup>31</sup>P: 162 MHz). Deuterated solvents (CDCl<sub>3</sub> and d<sub>6</sub>-DMSO) were used as internal standards. The chemical shifts are noted in parts per million (ppm), the coupling constants in Hz. The data is stated in the following way:

#### [EMIM][AcN(Me)PO<sub>3</sub>] (1)

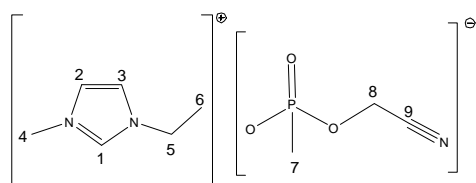

<sup>1</sup>H-NMR (DMSO-d<sub>6</sub>, 400 MHz, ppm): δ = 0.96 (d, 3H, J = 15.65 Hz, 7-H), 1.40 (t, 3H, J = 7.41 Hz, 6-H), 3.87 (s, 3H, 4-H), 4.21 (q, 2H, J = 0.74, Hz 5-H), 4.50 (d, 2H, J = 1.03 Hz, 8-H), 7.78 (s, 1H, 2-H), 7.87 (s, 1H, 3-H), 9.60 (s, 1H, 1-H).

<sup>13</sup>C-NMR (DMSO-d<sub>6</sub>, 100.4 MHz, ppm): δ = 14.00 (d, J = 13.22 Hz, C-7), 15.20 C-6, 35.52 C-4, 43.98 C-5, 49.02 C-8, 118.87 C-9, 122.09 C-3, 123.61 C-2, 137.15 C-1.

<sup>31</sup>P-NMR (DMSO-d<sub>6</sub>, 162 MHz, ppm): δ = 23.55.

|                 | Entire | Cation | Anion  |
|-----------------|--------|--------|--------|
| Mass calculated | 245.22 | 111.16 | 134.05 |

## Display Report

### Analysis Info

Analysis Name D:\Data\Jing Li\2011-07-08 ILS\ILs 1-neg00.d  
Method DEF\_MS.M  
Sample Name ILS  
Comment C9H16N3O3P  
1,14E-05M in ethanol

Acquisition Date 08/07/2011 09:59:54

Operator Jing Li  
Instrument esquire6000

### Acquisition Parameter

|                    |             |              |            |                          |          |
|--------------------|-------------|--------------|------------|--------------------------|----------|
| Ion Source Type    | ESI         | Ion Polarity | Negative   | Alternating Ion Polarity | off      |
| Mass Range Mode    | Std/Normal  | Scan Begin   | 50 m/z     | Scan End                 | 1000 m/z |
| Capillary Exit     | -106.0 Volt | Skimmer      | -40.0 Volt | Trap Drive               | 36.7     |
| Accumulation Time  | 500 µs      | Averages     | 7 Spectra  | ICC Actual               | 939      |
| Compound Stability | 100 %       | Target Mass  | 200 m/z    | Trap Drive Level         | 100 %    |

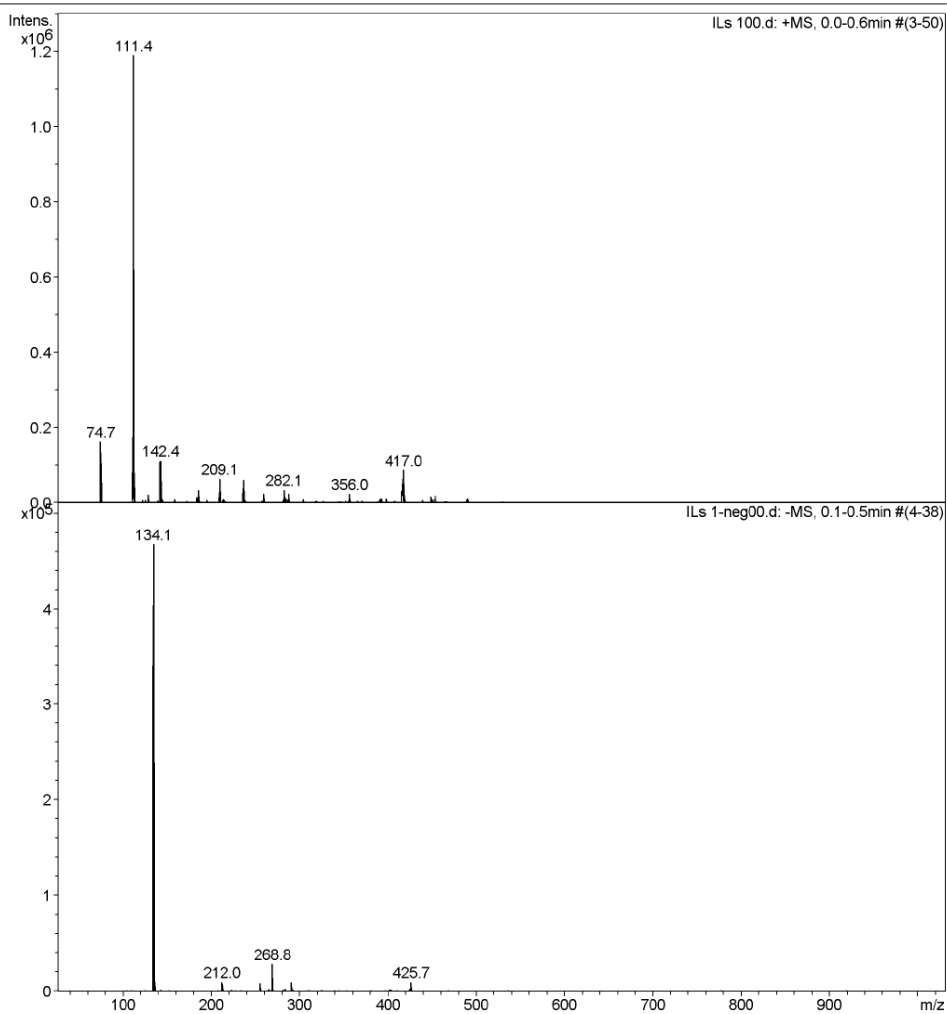

[EMIM][MeAc(Me)PO<sub>3</sub>] (2)

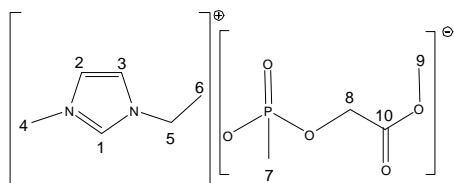

<sup>1</sup>H-NMR

(DMSO-d<sub>6</sub>, 400 MHz, ppm): δ = 0.91 (d, 3H, J = 15.66 Hz, 7-H), 1.40 (t, 3H, J = 7.42 Hz, 6-H), 3.60 (s, 3H, 9-H), 3.87 (s, 3H, 4-H), 4.21 (q, 2H, J = 0.72 Hz, 5-H), 4.24 (d, 2H, J = 0.86 Hz, 8-H), 7.78 (s, 1H, 2-H), 7.87 (s, 1H, 3-H), 9.66 (s, 1H, 1-H).

<sup>13</sup>C-NMR (DMSO-d<sub>6</sub>, 100.4 MHz, ppm): δ = 13.80 (d, J = 13.32 Hz, C-7), 15.27 C-6, 35.49 C-4, 43.96 C-5, 51.31 C-9, 61.02 C-8, 122.15 C-3, 123.67 C-2, 137.40 C-1, 171.26 C-10.

<sup>31</sup>P-NMR (DMSO-d<sub>6</sub>, 162 MHz, ppm): δ = 18.37.

|                 | Entire | Cation | Anion  |
|-----------------|--------|--------|--------|
| Mass calculated | 278.24 | 111.16 | 167.08 |

Display Report

Analysis Info

Analysis Name D:\Data\Jing Li\ILs 2-neg00.d  
 Method DEF\_MS.M  
 Sample Name ILs  
 Comment 1,1E-05M in MeOH  
 m/z 236 is impurity from MeOH

Acquisition Date 13/07/2011 10:07:52

Operator Jing Li  
 Instrument esquire6000

Acquisition Parameter

|                    |             |              |            |                          |          |
|--------------------|-------------|--------------|------------|--------------------------|----------|
| Ion Source Type    | ESI         | Ion Polarity | Negative   | Alternating Ion Polarity | off      |
| Mass Range Mode    | Std/Normal  | Scan Begin   | 50 m/z     | Scan End                 | 1000 m/z |
| Capillary Exit     | -106.0 Volt | Skimmer      | -40.0 Volt | Trap Drive               | 36.7     |
| Accumulation Time  | 500 μs      | Averages     | 7 Spectra  | ICC Actual               | 1345     |
| Compound Stability | 100 %       | Target Mass  | 200 m/z    | Trap Drive Level         | 100 %    |

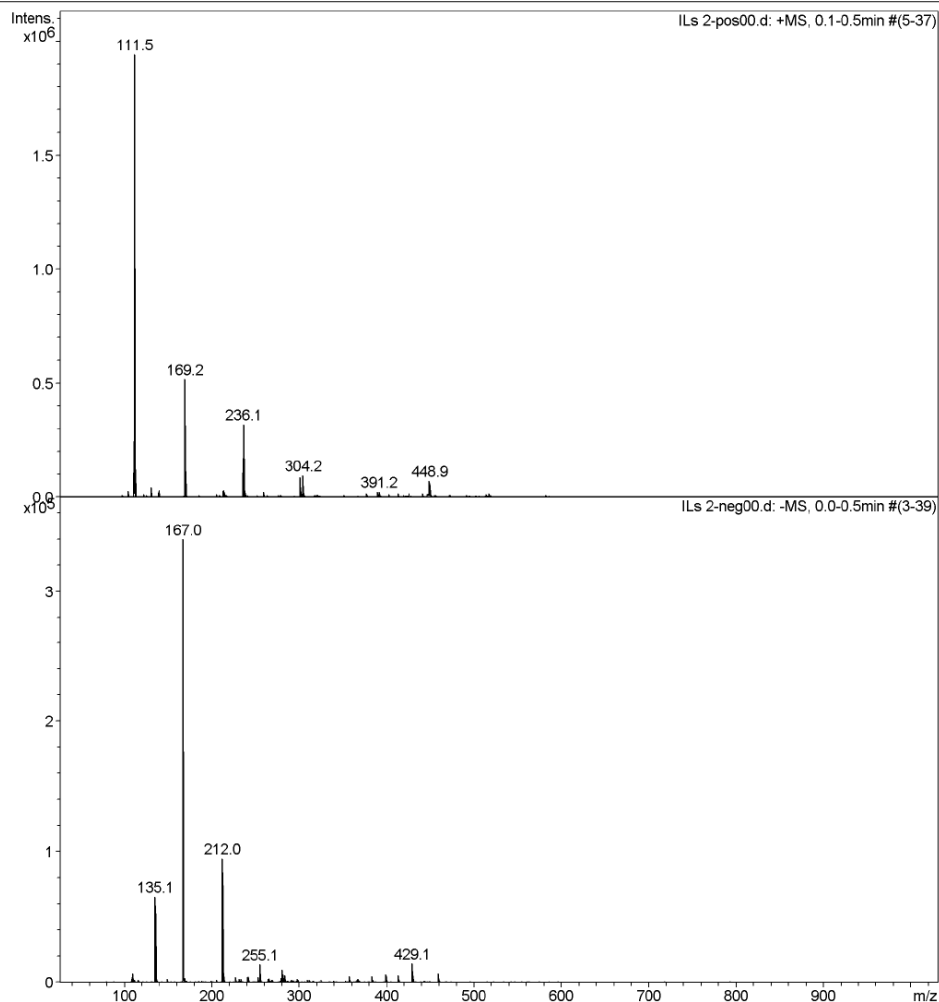

**[EMIM][Me(Me)PO<sub>3</sub>] (3)**

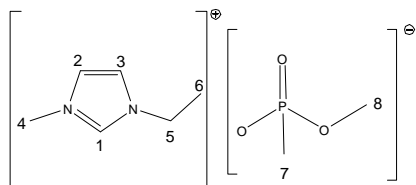

<sup>1</sup>H-NMR (DMSO-d<sub>6</sub>, 400 MHz, ppm): δ = 0.88 (d, 3H, J = 15.24 Hz, 7-H), 1.35 (t, 3H, J = 7.42 Hz, 6-H), 3.27 (d, 3H, J = 1.03 Hz, 8-H), 3.92 (s, 3H, 4-H), 4.25 (q, 2H, J = 0.74 Hz, 5-H), 8.08 (s, 1H, 2-H), 8.22 (s, 1H, 3-H), 10.26 (s, 1H, 1-H).

<sup>13</sup>C-NMR (DMSO-d<sub>6</sub>, 100.4 MHz, ppm): δ = 12.80 (d, J = 13.13 Hz, C-7), 15.30 C-6, 35.35 C-4, 43.83 C-5, 50.20 C-8, 122.23 C-3, 123.71 C-2, 137.71 C-1.

<sup>31</sup>P-NMR (DMSO-d<sub>6</sub>, 162 MHz, ppm): δ = 18.98.

|                 | Entire | Cation | Anion  |
|-----------------|--------|--------|--------|
| Mass calculated | 220.21 | 111.16 | 109.04 |

**Display Report**

**Analysis Info**

Analysis Name D:\Data\Jing Li\2011-07-08 ILs\ILs 3-neg00.d  
 Method DEF\_MS.M  
 Sample Name ILs  
 Comment C8H17N2O3P  
 1.31E-05M in ethanol

Acquisition Date 08/07/2011 10:44:56

Operator Jing Li  
 Instrument esquire6000

**Acquisition Parameter**

|                    |             |              |            |                          |          |
|--------------------|-------------|--------------|------------|--------------------------|----------|
| Ion Source Type    | ESI         | Ion Polarity | Negative   | Alternating Ion Polarity | off      |
| Mass Range Mode    | Std/Normal  | Scan Begin   | 50 m/z     | Scan End                 | 1000 m/z |
| Capillary Exit     | -106.0 Volt | Skimmer      | -40.0 Volt | Trap Drive               | 36.7     |
| Accumulation Time  | 500 μs      | Averages     | 7 Spectra  | ICC Actual               | 595      |
| Compound Stability | 100 %       | Target Mass  | 200 m/z    | Trap Drive Level         | 100 %    |

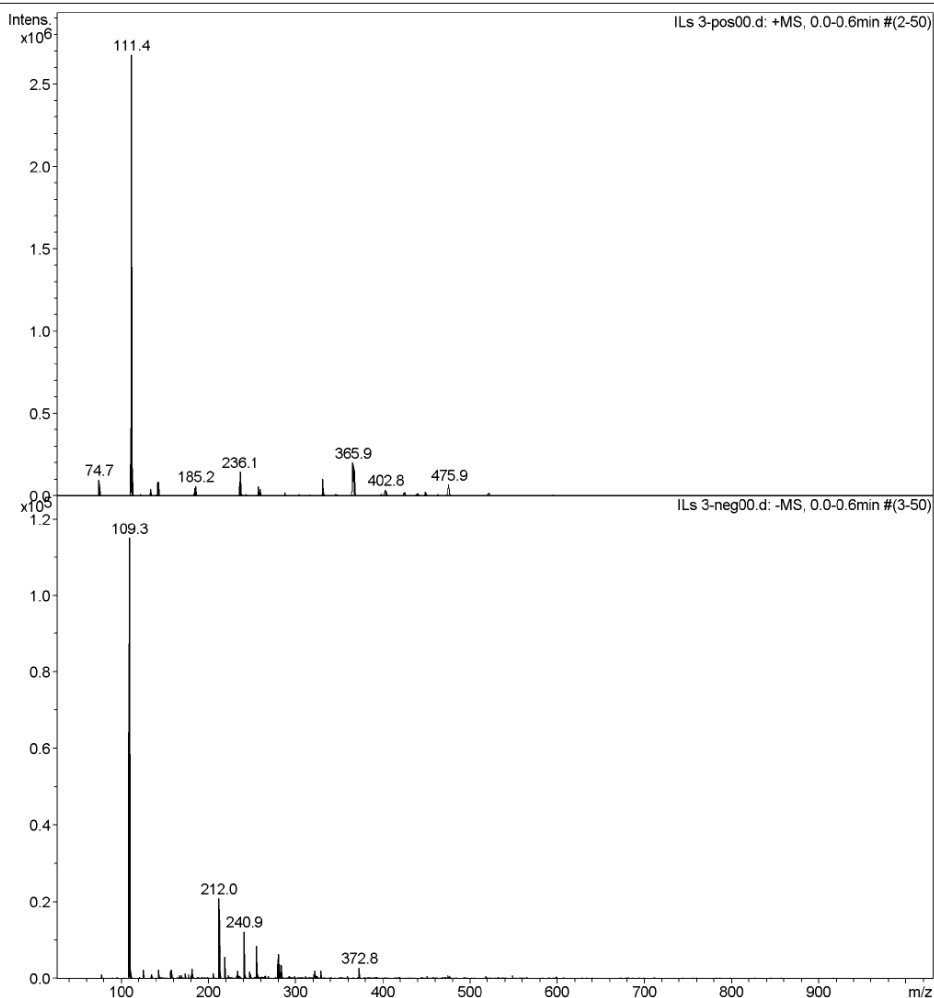

**[BMIM][Bu(Me)PO<sub>3</sub>] (4)**

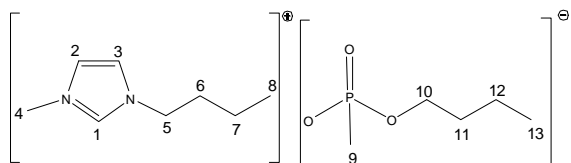

<sup>1</sup>H-NMR (CDCl<sub>3</sub>, 400 MHz, ppm): δ = 0.78 (t, 3H, J = 7.42 Hz, 8-H), 0.84 (t, 3H, J = 7.41 Hz, 13-H), 1.19 (d, 3H, J = 16.07 Hz, 9-H), 1.27 (m, 4H, 7-H and 12-H), 1.47 (m, 2H, 6-H), 1.75 (m, 2H, 11-H), 3.74 (q, 2H, J = 0.66 Hz, 5-H), 3.96 (s, 3H, 4-H), 4.19 (t, 2H, J = 0.74 Hz, 10-H), 7.19 (s, 1H, 2-H), 7.31 (s, 1H, 3-H), 10.75 (s, 1H, 1-H).

<sup>13</sup>C-NMR (DMSO-d<sub>6</sub>, 100.4 MHz, ppm): δ = 13.00 (d, J = 13.22 Hz, C-9), 13.14 C-8, 13.54 C-13, 18.60 C-12, 18.75 C-7, 31.56 C-11, 32.87 C-6, 35.37 C-4, 48.17 C-5, 62.33 C-10, 122.38 C-3, 123.58 C-2, 137.86 C-1.

<sup>31</sup>P-NMR (CDCl<sub>3</sub>, 162 MHz, ppm): δ = 22.70.

|                 | Entire | Cation | Anion  |
|-----------------|--------|--------|--------|
| Mass calculated | 290.34 | 139.22 | 151.12 |

**Display Report**

**Analysis Info**

Analysis Name D:\Data\Jing Li\2011-07-08 ILS\ILs 4-neg00.d  
 Method DEF\_MS.M  
 Sample Name ILS  
 Comment C13H27N2O3P  
 6.89E-06M in ethalnoI

Acquisition Date 08/07/2011 10:53:50

Operator Jing Li  
 Instrument esquire6000

**Acquisition Parameter**

|                    |             |              |            |                          |          |
|--------------------|-------------|--------------|------------|--------------------------|----------|
| Ion Source Type    | ESI         | Ion Polarity | Negative   | Alternating Ion Polarity | off      |
| Mass Range Mode    | Std/Normal  | Scan Begin   | 50 m/z     | Scan End                 | 1000 m/z |
| Capillary Exit     | -106.0 Volt | Skimmer      | -40.0 Volt | Trap Drive               | 36.7     |
| Accumulation Time  | 500 μs      | Averages     | 7 Spectra  | ICC Actual               | 1078     |
| Compound Stability | 100 %       | Target Mass  | 200 m/z    | Trap Drive Level         | 100 %    |

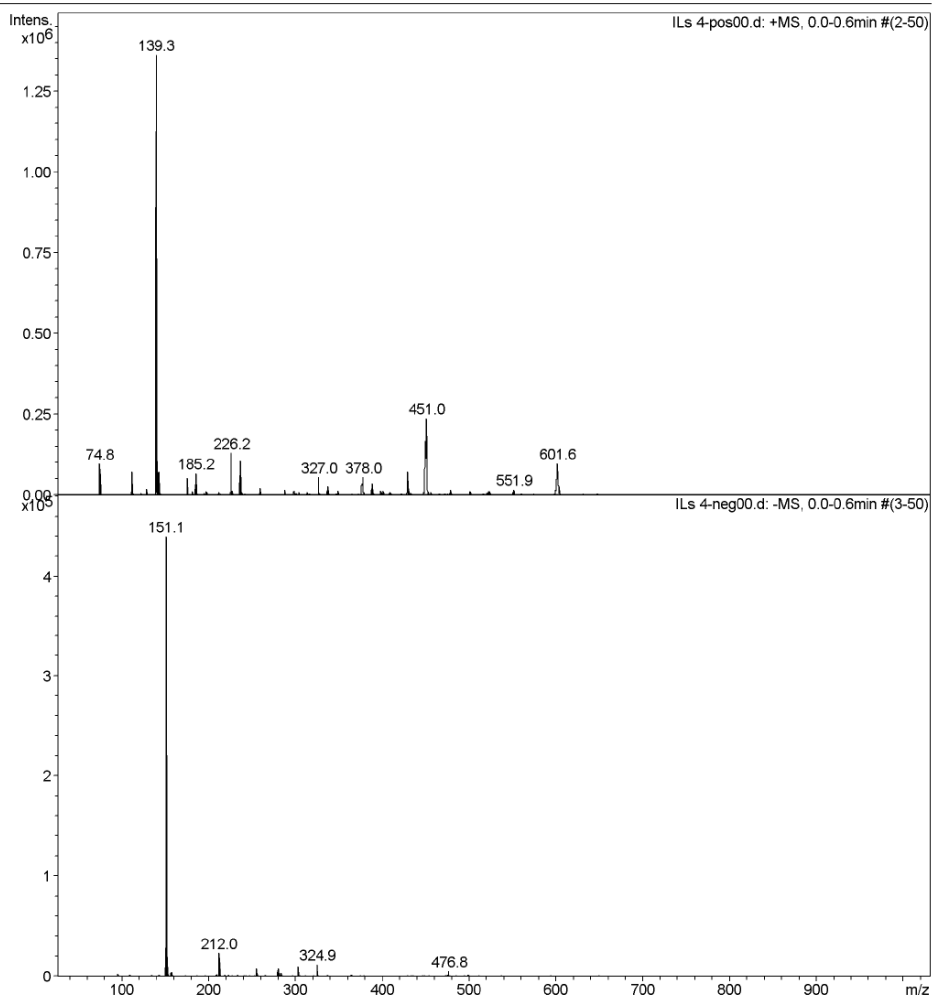

[OMIM][Oc(Me)PO<sub>3</sub>] (5)

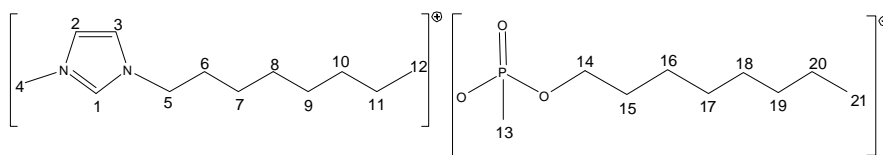

<sup>1</sup>H-NMR (CDCl<sub>3</sub>, 400 MHz, ppm): δ = 0.74 (m, 6H, 12-H and 21-H), 1.19 (d, 3H, J = 15.65 Hz, 13-H), 1.13 (m, 20H, 7-H – 11-H and 16-H – 20-H), 1.48 (m, 2H, 6-H), 1.75 (m, 2H, 15-H), 3.71 (q, 2H, J = 0.70, Hz 5-H), 3.96 (s, 3H, 4-H), 4.16 (t, 2H, J = 0.74 Hz, 14-H), 7.15 (s, 1H, 2-H), 7.29 (s, 1H, 3-H), 10.92 (s, 1H, 1-H).

<sup>13</sup>C-NMR (DMSO-d<sub>6</sub>, 100.4 MHz, ppm): δ = 13.00 (d, J = 13.22 Hz, C-13), 13.74 C-12, 22.11 C-21, 22.59 (2C, C-11 and C-20), 28.54 – 31.34 (m, 10C, C-6 – C-10 and C-15 – C-19), 35.39 C-4, 48.46 C-5, 62.66 C-14, 122.36 C-3, 123.53 C-2, 137.82 C-1.

<sup>31</sup>P-NMR (CDCl<sub>3</sub>, 162 MHz, ppm): δ = 22.40.

|                 | Entire | Cation | Anion  |
|-----------------|--------|--------|--------|
| Mass calculated | 402.55 | 195.32 | 207.23 |

Display Report

Analysis Info

Analysis Name D:\Data\Jing Li\2011-07-08 ILs\ILs 5-neg00.d  
 Method DEF\_MS.M  
 Sample Name ILs  
 Comment C21H43N2O3P  
 9.74E-06M in ethanol

Acquisition Date 08/07/2011 11:06:12

Operator Jing Li  
 Instrument esquire6000

Acquisition Parameter

|                    |             |              |            |                          |          |
|--------------------|-------------|--------------|------------|--------------------------|----------|
| Ion Source Type    | ESI         | Ion Polarity | Negative   | Alternating Ion Polarity | off      |
| Mass Range Mode    | Std/Normal  | Scan Begin   | 50 m/z     | Scan End                 | 1000 m/z |
| Capillary Exit     | -106.0 Volt | Skimmer      | -40.0 Volt | Trap Drive               | 36.7     |
| Accumulation Time  | 500 μs      | Averages     | 7 Spectra  | ICC Actual               | 3524     |
| Compound Stability | 100 %       | Target Mass  | 200 m/z    | Trap Drive Level         | 100 %    |

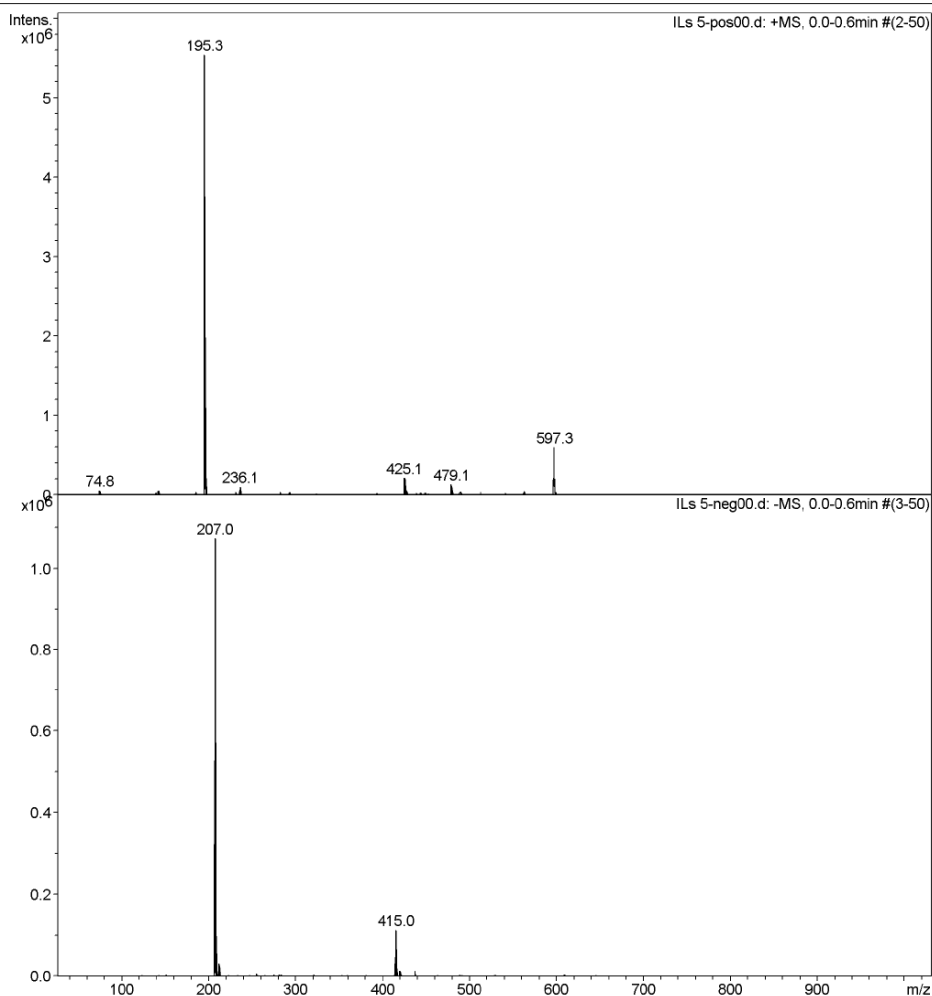

[OMIM][Oc(Ph)PO<sub>3</sub>] (6)

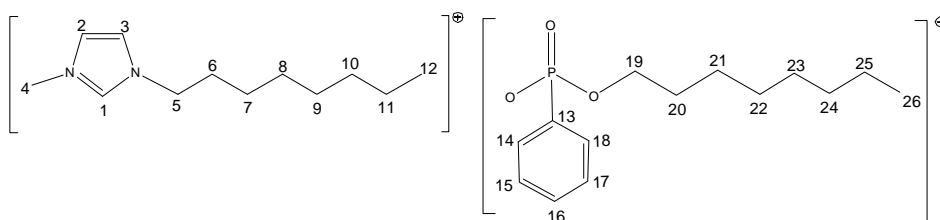

<sup>1</sup>H-NMR (DMSO-d<sub>6</sub>, 400 MHz, ppm): δ = 0.84 (m, 6H, 12-H and 26-H), 1.14 – 1.21 (m, 20H, 7-H – 11H and 21-H – 25-H), 1.35 (m, 2H, 6-H), 1.74 (m, 2H, 20-H), 3.50 (q, 2H, J = 0.66 Hz, 5-H), 3.85 (s, 3H, 4-H), 4.16 (t, 2H, J = 0.74 Hz, 19-H), 7.25 (m, 3H, 15-H – 17-H), 7.60 (m, 2H, 14-H and 18-H), 7.79 (s, 1H, 2-H), 7.89 (s, 1H, 3-H), 10.78 (s, 1H, 1-H).

<sup>13</sup>C-NMR (DMSO-d<sub>6</sub>, 100.4 MHz, ppm): δ = 13.82 C-12, 22.08 C-26, 25.40 – 31.25 (m, 12C, C-6 – C-11 and C-20 – C-25), 35.46 C-4, 48.55 C-5, 62.89 C-19, 122.30 C-3, 123.49 C-2, 127.05 (m, 2C, C-15 and C-17), 128.3 (m, 2C, C-13 and C-16), 131.08 (m, 2C, C-14 and C-18), 137.48 C-1.

<sup>31</sup>P-NMR (DMSO-d<sub>6</sub>, 162 MHz, ppm): δ = 9.33.

|                 | Entire | Cation | Anion  |
|-----------------|--------|--------|--------|
| Mass calculated | 464.62 | 195.32 | 269.30 |

Display Report

**Analysis Info**  
 Analysis Name D:\Data\Jing Li\2011-07-08 ILs\ILs 6-neg00.d Acquisition Date 08/07/2011 12:48:22  
 Method DEF\_MS.M Operator Jing Li  
 Sample Name ILs Instrument esquire6000  
 Comment C26H45N2O3P  
 6.76E-06M in ethanol

**Acquisition Parameter**  
 Ion Source Type ESI Ion Polarity Negative Alternating Ion Polarity off  
 Mass Range Mode Std/Normal Scan Begin 50 m/z Scan End 1000 m/z  
 Capillary Exit -106.0 Volt Skimmer -40.0 Volt Trap Drive 36.7  
 Accumulation Time 500 μs Averages 7 Spectra ICC Actual 3374  
 Compound Stability 100 % Target Mass 200 m/z Trap Drive Level 100 %

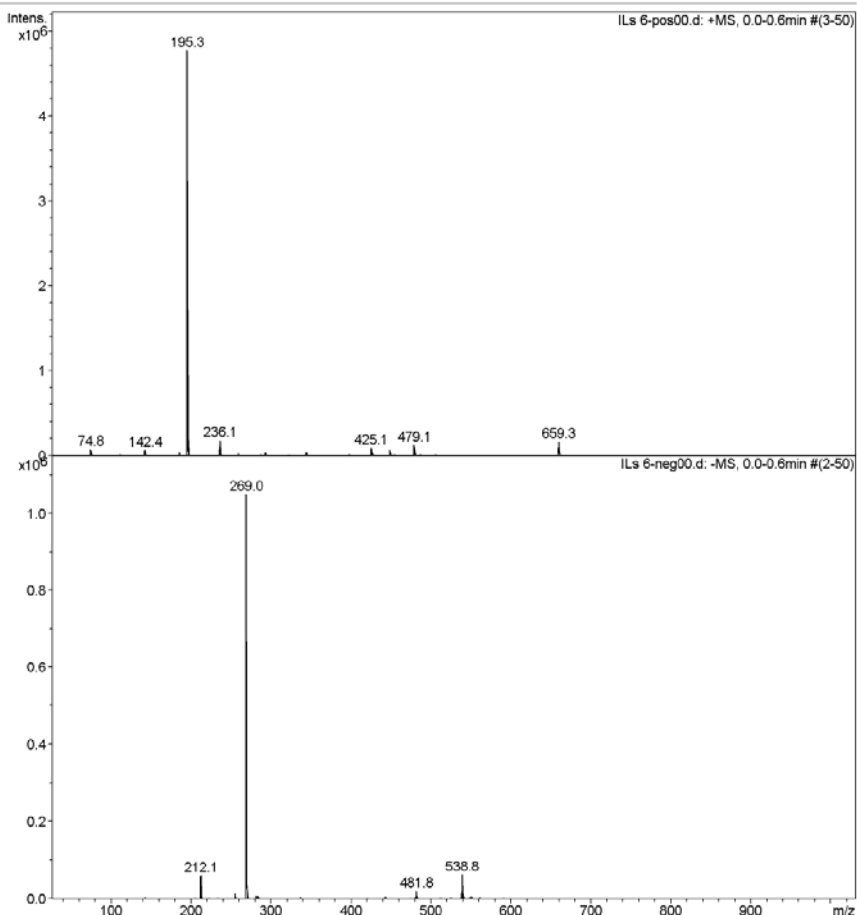



[(MeEG<sub>3</sub>)MIM][(MeEG<sub>3</sub>)(Me)PO<sub>3</sub>] (7)

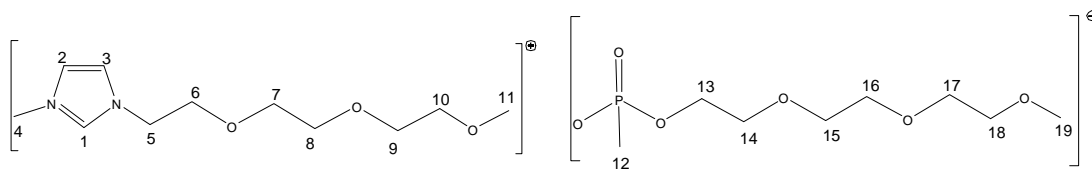

<sup>1</sup>H-NMR (DMSO-d<sub>6</sub>, 400 MHz, ppm): δ = 0.98 (d, 3H, J = 16.10 Hz, 12-H), 3.22 (m, 6H, 11-H and 19-H), 3.41 (m, 4H, 8-H and 18-H), 3.44 – 3.51 (m, 12H, 7-H – 9-H and 15-H – 17-H), 3.54 (m, 2H, 6-H), 3.70 – 3.80 (m, 4H, 5-H and 14-H), 3.88 (s, 3H, 4-H), 4.38 (t, 2H, J = 0.5 Hz, 13-H), 7.77 (s, 1H, 2-H), 7.80 (s, 1H, 3-H), 9.45 (s, 1H, 1-H).

<sup>13</sup>C-NMR (DMSO-d<sub>6</sub>, 100.4 MHz, ppm): δ = 13.00 (d, J = 13.42 Hz, C-12), 35.51 C-4, 48.50 C-5, 58.01 (2C, C-11 and C-19), 60.0 – 70.70 (m, 10C, C-6 – C-10 and C-14 – C-18), 71.30 C-13, 122.70 C-3, 123.39 C-2, 137.62 C-1.

<sup>31</sup>P-NMR (DMSO-d<sub>6</sub>, 162 MHz, ppm): δ = 20.32.

|                 | Entire | Cation | Anion  |
|-----------------|--------|--------|--------|
| Mass calculated | 470.49 | 229.30 | 241.20 |

Display Report

Analysis Info

Analysis Name D:\Data\Jing Li\2011-07-08 ILS\ILs 7-neg00.d  
 Method DEF\_MS.M  
 Sample Name ILS  
 Comment C19H39N2O9P  
 1.58E-05M in ethanol

Acquisition Date 08/07/2011 13:02:12

Operator Jing Li  
 Instrument esquire6000

Acquisition Parameter

|                    |             |              |            |                          |          |
|--------------------|-------------|--------------|------------|--------------------------|----------|
| Ion Source Type    | ESI         | Ion Polarity | Negative   | Alternating Ion Polarity | off      |
| Mass Range Mode    | Std/Normal  | Scan Begin   | 50 m/z     | Scan End                 | 1000 m/z |
| Capillary Exit     | -106.0 Volt | Skimmer      | -40.0 Volt | Trap Drive               | 36.7     |
| Accumulation Time  | 500 μs      | Averages     | 7 Spectra  | ICC Actual               | 834      |
| Compound Stability | 100 %       | Target Mass  | 200 m/z    | Trap Drive Level         | 100 %    |

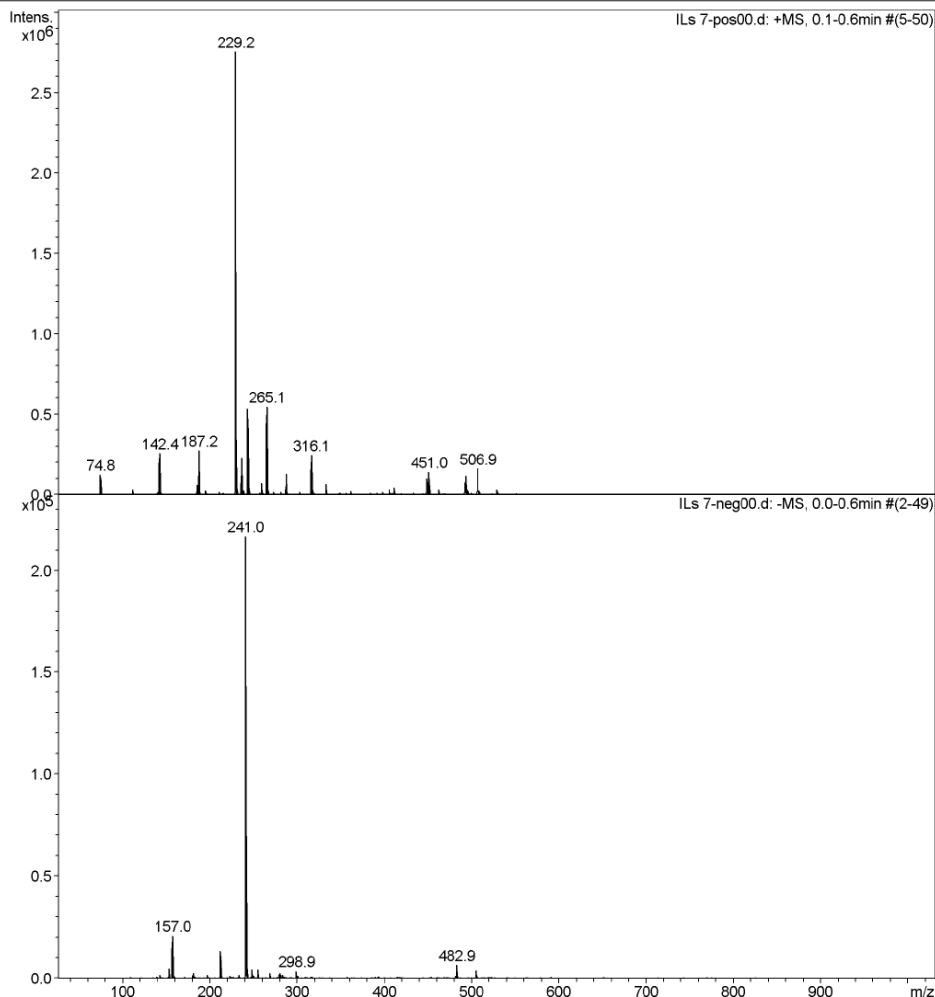

**[DodMIM][Dod(Me)PO<sub>3</sub>] (8)**

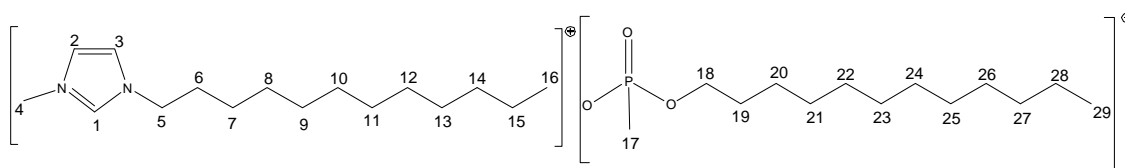

<sup>1</sup>H-NMR (DMSO-d<sub>6</sub>, 400 MHz, ppm): δ = 0.83 – 0.89 (m, 9H, 16-H, 17-H and 29-H), 1.23 (m, 36H, 7-15-H and 20-28-H), 1.43 (m, 2H, 6-H), 1.77 (m, 2H, 19-H), 3.56 (q, 2H, J = 0.66 Hz, 5-H), 3.86 (s, 3H, 4-H), 4.15 (t, 2H, J = 0.70 Hz, 18-H), 7.71 (s, 1H, 2-H), 7.78 (s, 1H, 3-H), 9.41 (s, 1H, 1-H).

<sup>13</sup>C-NMR (DMSO-d<sub>6</sub>, 100.4 MHz, ppm): δ = 13.00 (d, J = 13.23 Hz, C-17), 13.69 (2C, C-16 and C-29), 22.00 (2C, C-15 and C-28), 25.42 – 31.22 (m, 18C, C-6 – C-14 and C-19 – C-27), 35.43 C-4, 48.72 C-5, 62.80 C-18, 121.96 C-3, 123.27 C-2, 137.57 C-1.

<sup>31</sup>P-NMR (DMSO-d<sub>6</sub>, 162 MHz, ppm): δ = 16.97.

|                 | Entire | Cation | Anion  |
|-----------------|--------|--------|--------|
| Mass calculated | 514.76 | 251.43 | 263.33 |

**Display Report**

**Analysis Info**  
 Analysis Name D:\Data\Jing Li\2011-07-08 ILS\ILs 8-neg00.d  
 Method DEF\_MS.M  
 Sample Name ILS  
 Comment C29H59N2O3P  
 8.31E-06M in ethanol  
 Acquisition Date 08/07/2011 13:16:38  
 Operator Jing Li  
 Instrument esquire6000

**Acquisition Parameter**  
 Ion Source Type ESI  
 Mass Range Mode Std/Normal  
 Capillary Exit -108.0 Volt  
 Accumulation Time 500 μs  
 Compound Stability 100 %  
 Ion Polarity Negative  
 Scan Begin 50 m/z  
 Skimmer -40.0 Volt  
 Averages 7 Spectra  
 Target Mass 200 m/z  
 Alternating Ion Polarity off  
 Scan End 1000 m/z  
 Trap Drive 36.7  
 ICC Actual 4488  
 Trap Drive Level 100 %

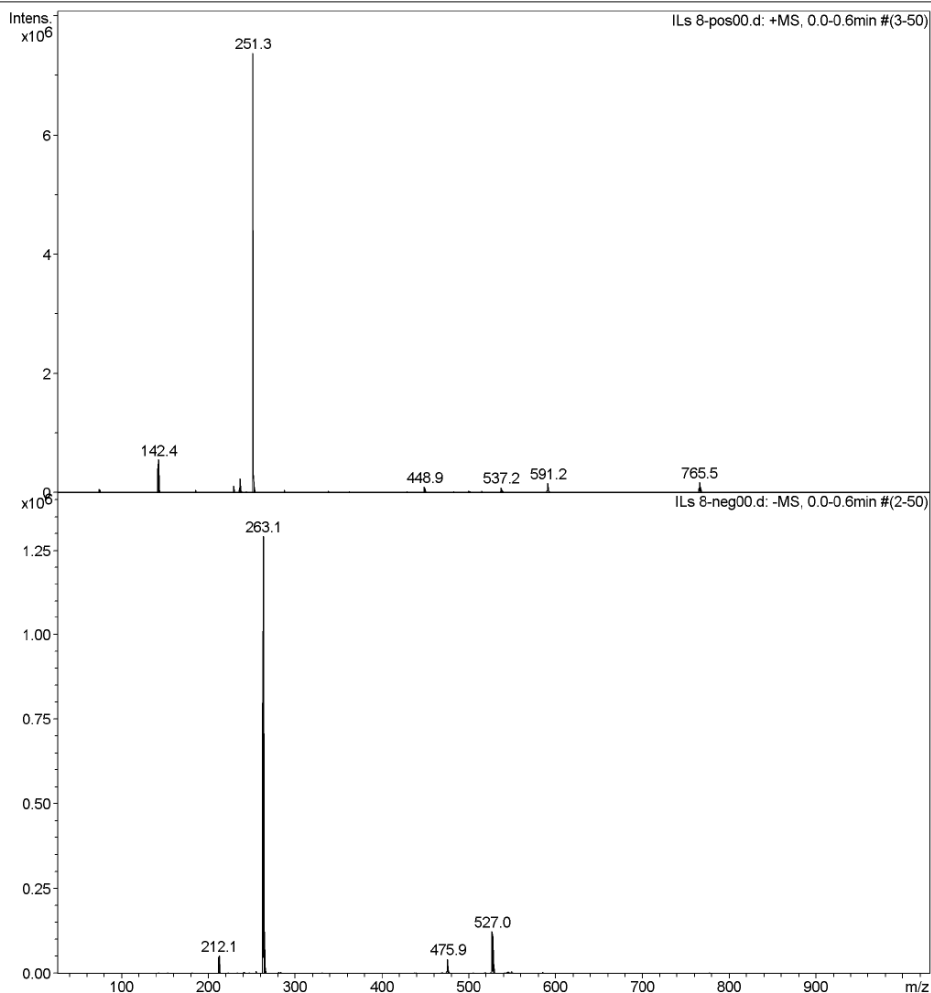

### Hydrolysis of the [MeAc(Me)PO<sub>3</sub>] ion

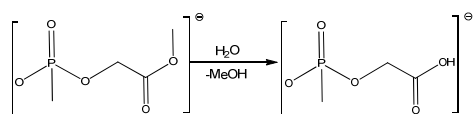

#### Scheme S1:

The signal for the methyl group at 3.56 ppm in the <sup>1</sup>H-NMR spectrum disappeared upon refluxing in water and the signal for phosphorous shifted upfield from 19 to 25 ppm. However, this step may be regarded as further functionalization possibility. The free carboxylic acid group is now disposable for coupling reactions like esterification or amidation or may be deprotonated to provide a dianion.

### SI References

[S1] E. Kuhlmann, S. Himmler, H. Giebelhaus, and P. Wasserscheid, *Green Chem.*, 2007, **9**, 233.
